# Supplementary material
Source: PubMed Central journal article supplement (PMC8201701)

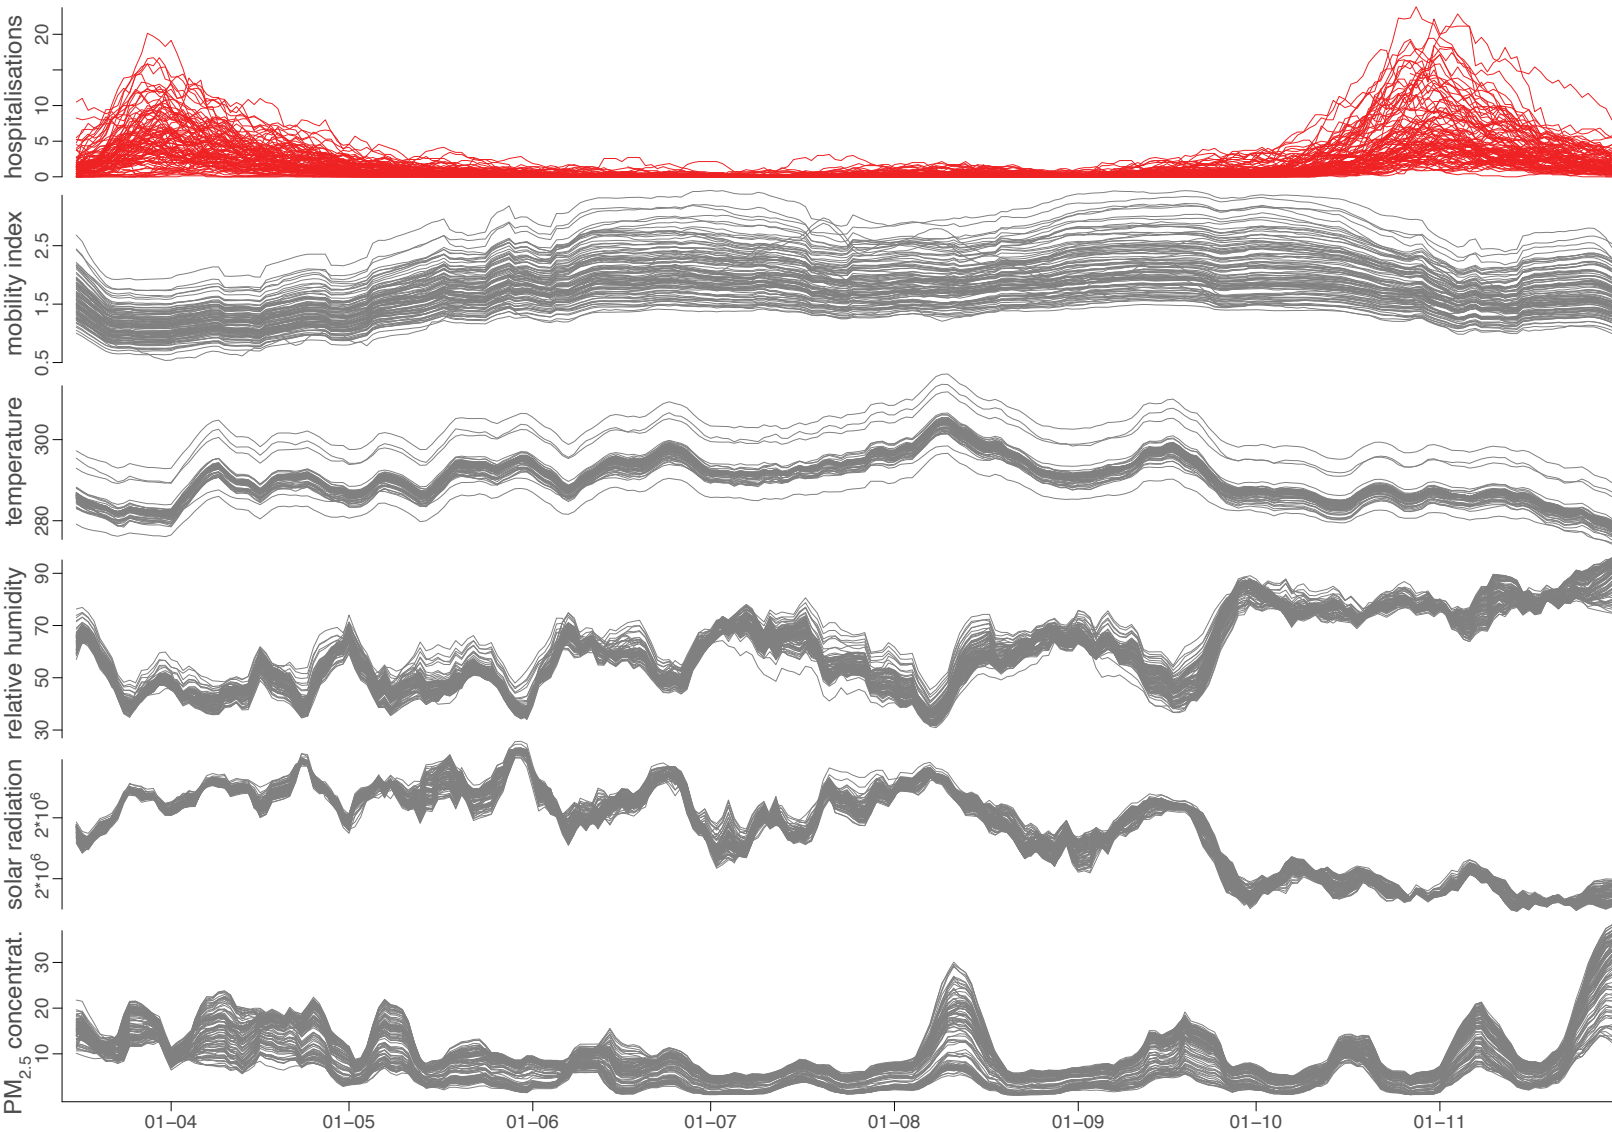

Supplement: 12942_2021_281_MOESM3_ESM.pdf [file 12942_2021_281_MOESM3_ESM.pdf]
